# Supplementary material for: Electric double layer capacitors based on a composite electrode of activated mesophase pitch and carbon nanotubes
Source: Royal Society of Chemistry journal article supplement (doi:10.1039/c2jm15645h), 2012-01-01
Supplement: c2jm15645h.pdf [file c2jm15645h.pdf]

# Electronic Supplementary Information

## Electric Double Layer Capacitors Based on a Composite Electrode of Activated Mesophase Pitch and Carbon Nanotubes

Cheng-Wei Huang,<sup>a</sup> Chien-Te Hsieh,<sup>b</sup> Ping-Lin Kuo,<sup>a</sup> and Hsisheng Teng<sup>\*ac</sup>

<sup>a</sup>Department of Chemical Engineering and Research Center for Energy Technology  
and Strategy, National Cheng Kung University, Tainan 70101, Taiwan

<sup>b</sup>Department of Chemical Engineering and Materials Science, Yuan Ze Fuel Cell  
Center, Yuan Ze University, Taoyuan 32023, Taiwan

<sup>c</sup>Center for Micro/Nano Science and Technology, National Cheng Kung University,  
Tainan 70101, Taiwan

E-mail address: [hteng@mail.ncku.edu.tw](mailto:hteng@mail.ncku.edu.tw)

Telephone: 886-6-2385371, Fax: 886-6-2344496

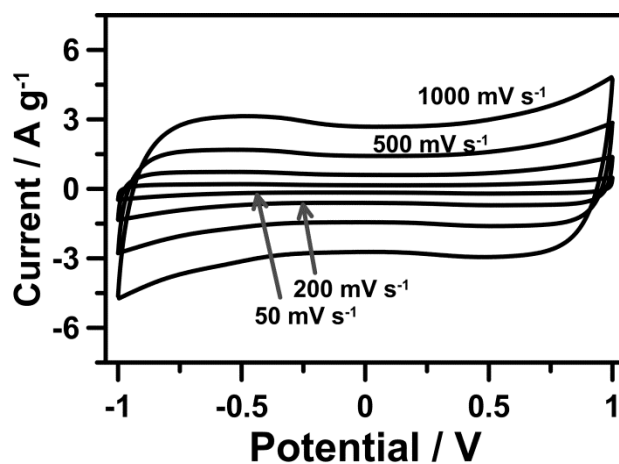

**Fig. S1.** Cyclic voltammograms of a symmetric two-electrode capacitor assembled with CNTs electrodes and 2 M H<sub>2</sub>SO<sub>4</sub> as the electrolyte solution. The electrodes consisted of a 1 cm<sup>2</sup> carbon film (2 mg) and a titanium foil current collector.

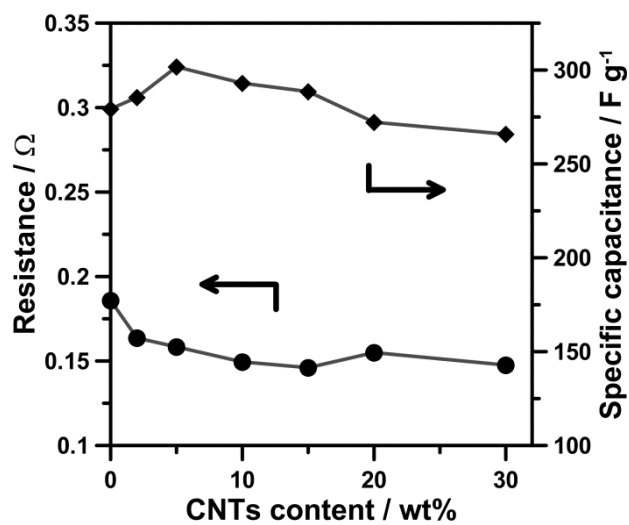

**Fig. S2.** Variation of resistance and specific capacitance of the CNTs/aMP composites with the CNT content. The resistance values were measured for a symmetric two-electrode cell using electrochemical impedance analysis at 1 kHz. The specific capacitance was estimated using integration of full cyclic voltammograms within -1 to 1 V at a scan rate of  $5 \text{ mV s}^{-1}$ .
